# Supplementary material
Source: PubMed Central journal article supplement (PMC6797074)
Supplement: Supp_FigS1-TableS1.pdf [file Supp_FigS1-TableS1.pdf]

## Supplementary Data

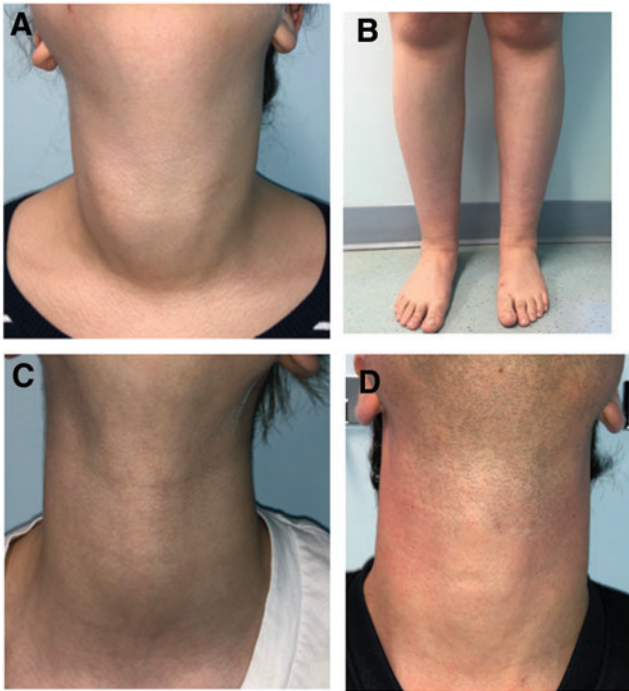

**SUPPLEMENTARY FIG. S1.** (A, C, D) Neck pictures of the proband brother and father, respectively (see also Supplementary Table S1). (B) Picture of the lower extremities of the proband showing the nonpitting edema.

SUPPLEMENTARY TABLE S1. THYROID ULTRANOGRAPHY AND VITAL SIGNS

| Individual | Lobe | Ultranography of the thyroid gland |           |           |            | Heart rate, beats/min | BP, mmHg |
|------------|------|------------------------------------|-----------|-----------|------------|-----------------------|----------|
|            |      | Length, mm                         | Width, mm | Depth, mm | Volume, mL |                       |          |
| Proband    | Rt   | 82                                 | 32        | 26        | 103        | 120                   | 133/21   |
|            | Lt   | 77                                 | 27        | 20        |            |                       |          |
| Brother    | Rt   | 48                                 | 14        | 15        | 11         | 88                    | 119/71   |
|            | Lt   | 41                                 | 17        | 17        |            |                       |          |
| Father     |      | Not available <sup>a</sup>         |           |           |            | 60                    | 129/69   |

<sup>a</sup>Estimated weight from examination and scintigraphy 18–20 g.  
BP, blood pressure.
